# Supplementary material
Source: PubMed Central journal article supplement (PMC4277575)
Supplement: AEM.03286-14_zam999105955so1.pdf [file AEM.03286-14_zam999105955so1.pdf]

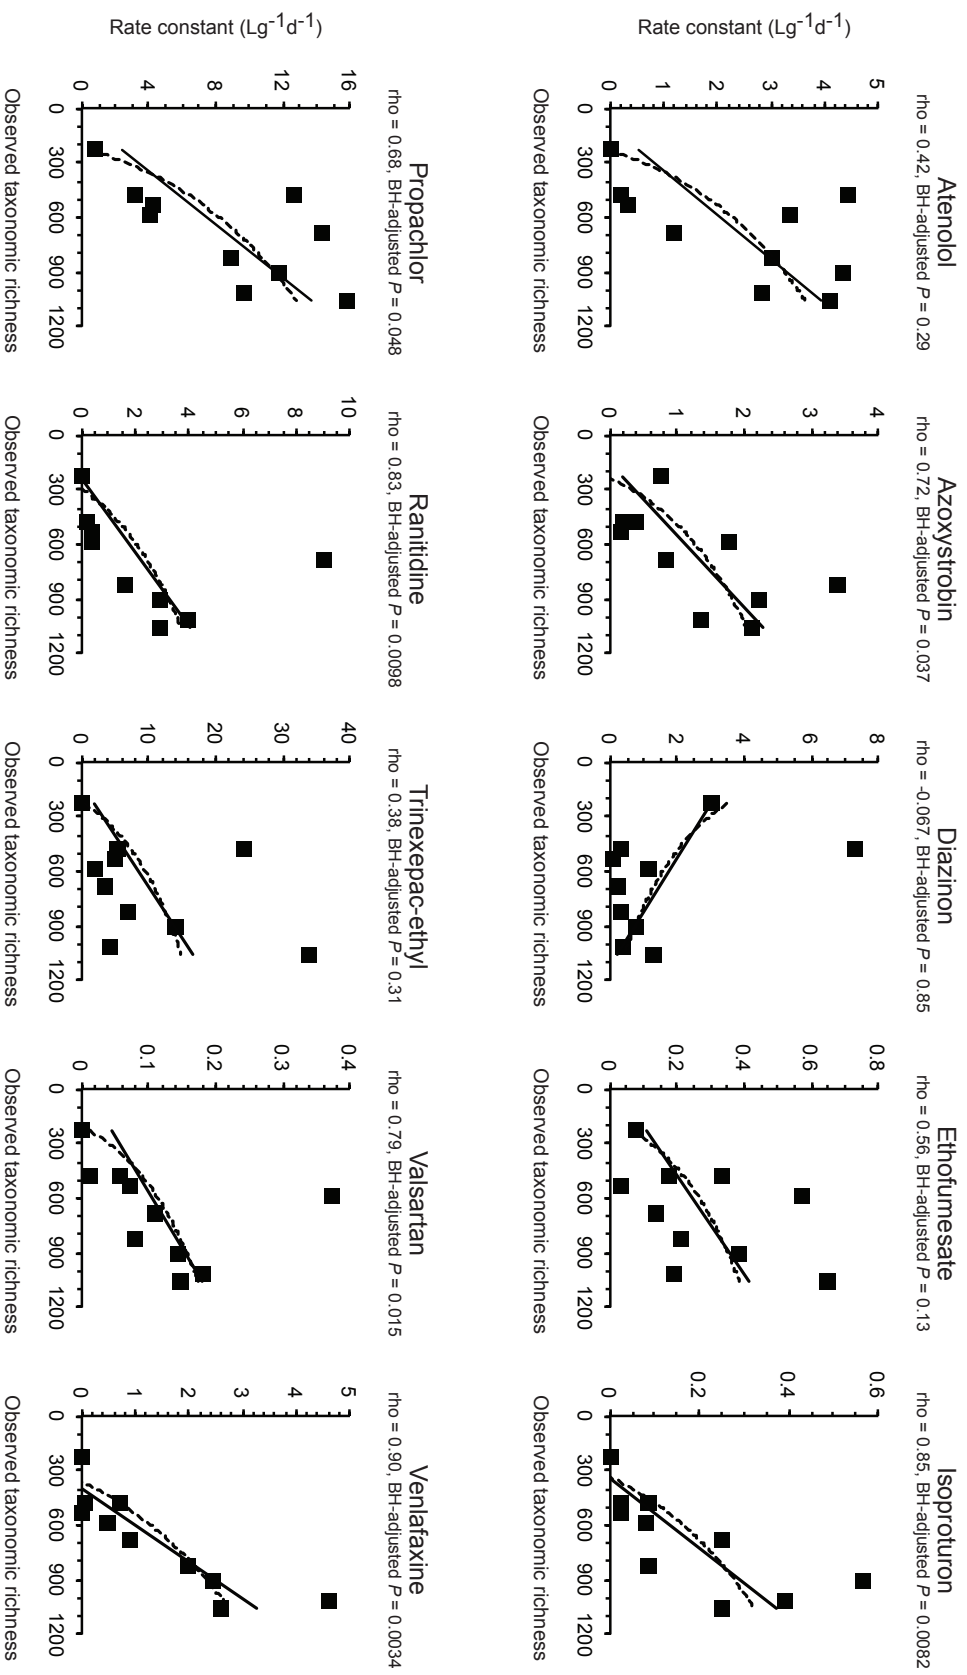

**Figure S1.** Associations between the observed taxonomic richness measurements and the active biomass-normalized first-order rate constants for each individual micropollutant biotransformation. Each square symbol indicates the measurements for one independent WWTP community. The solid lines are the best-fit linear models and the dashed lines are the best-fit logarithmic models. Definitions:  $\rho$ , Spearman rank correlation coefficient; BH-adjusted  $P$ , Benjamini-Hochberg-adjusted two-sided  $P$ .

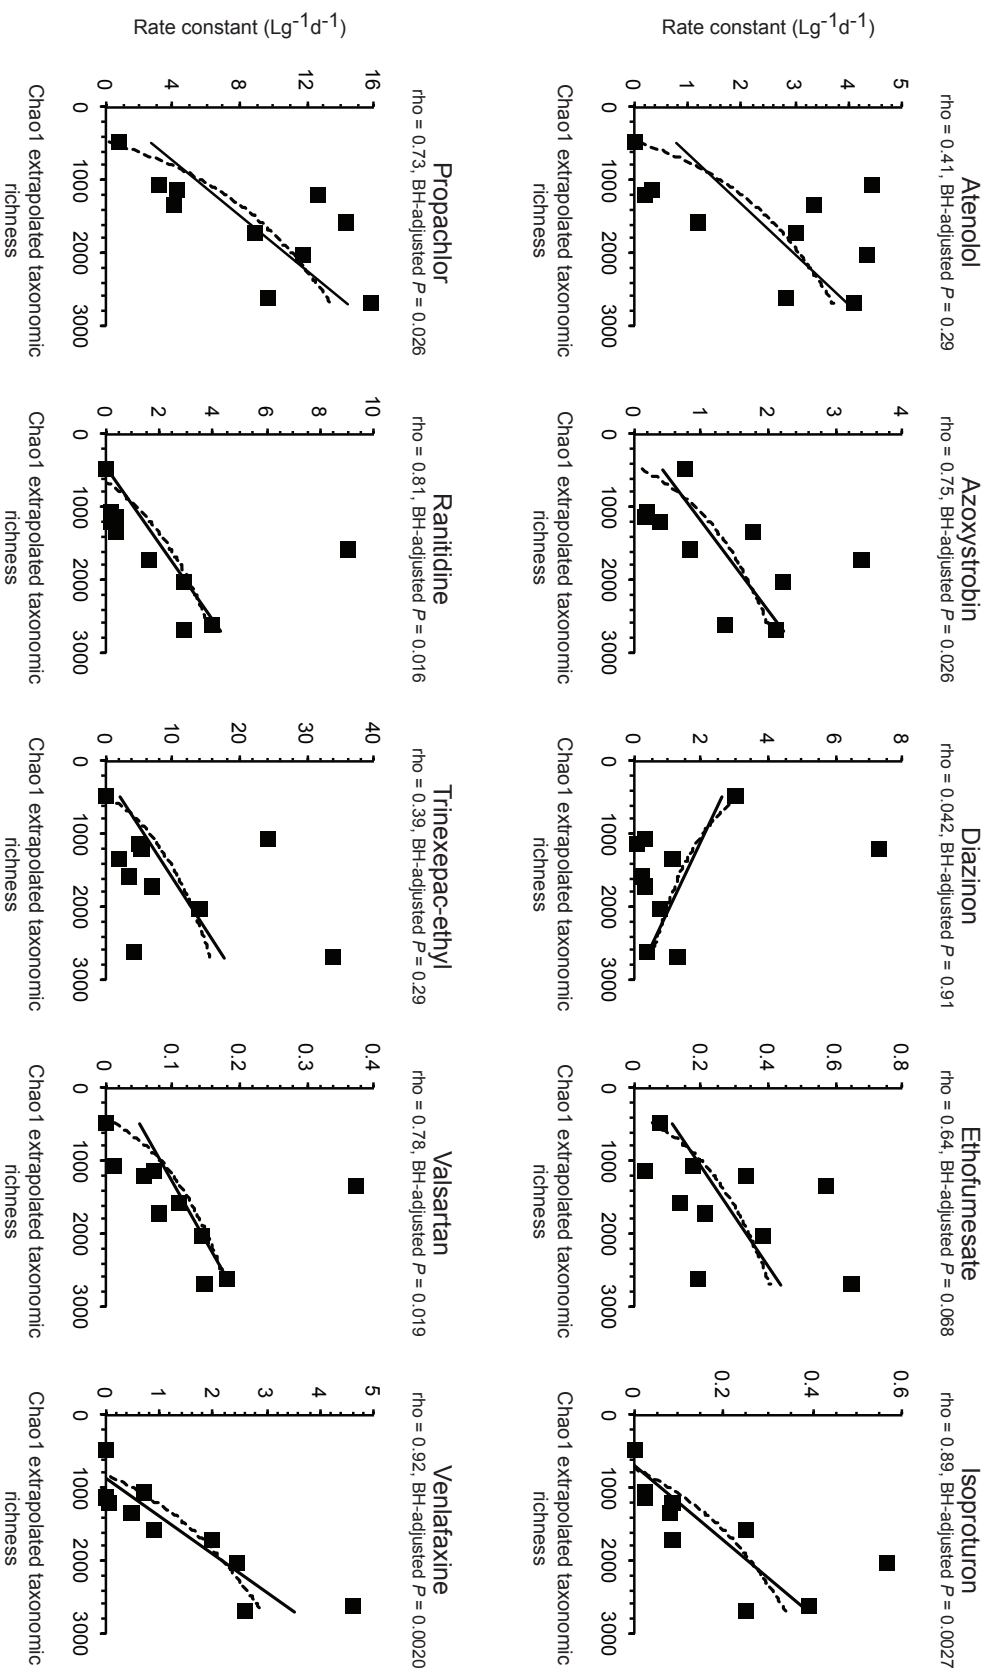

**Figure S2.** Associations between the Chao1 extrapolated taxonomic richness measurements and the active biomass-normalized first-order rate constants for each individual micropollutant biotransformation. Each square symbol indicates the measurements for one independent WWTP community. The solid lines are the best-fit linear models and the dashed lines are the best-fit logarithmic models. Definitions:  $\rho$ , Spearman rank correlation coefficient; BH-adjusted  $P$ , Benjamini-Hochberg-adjusted two-sided  $P$ .

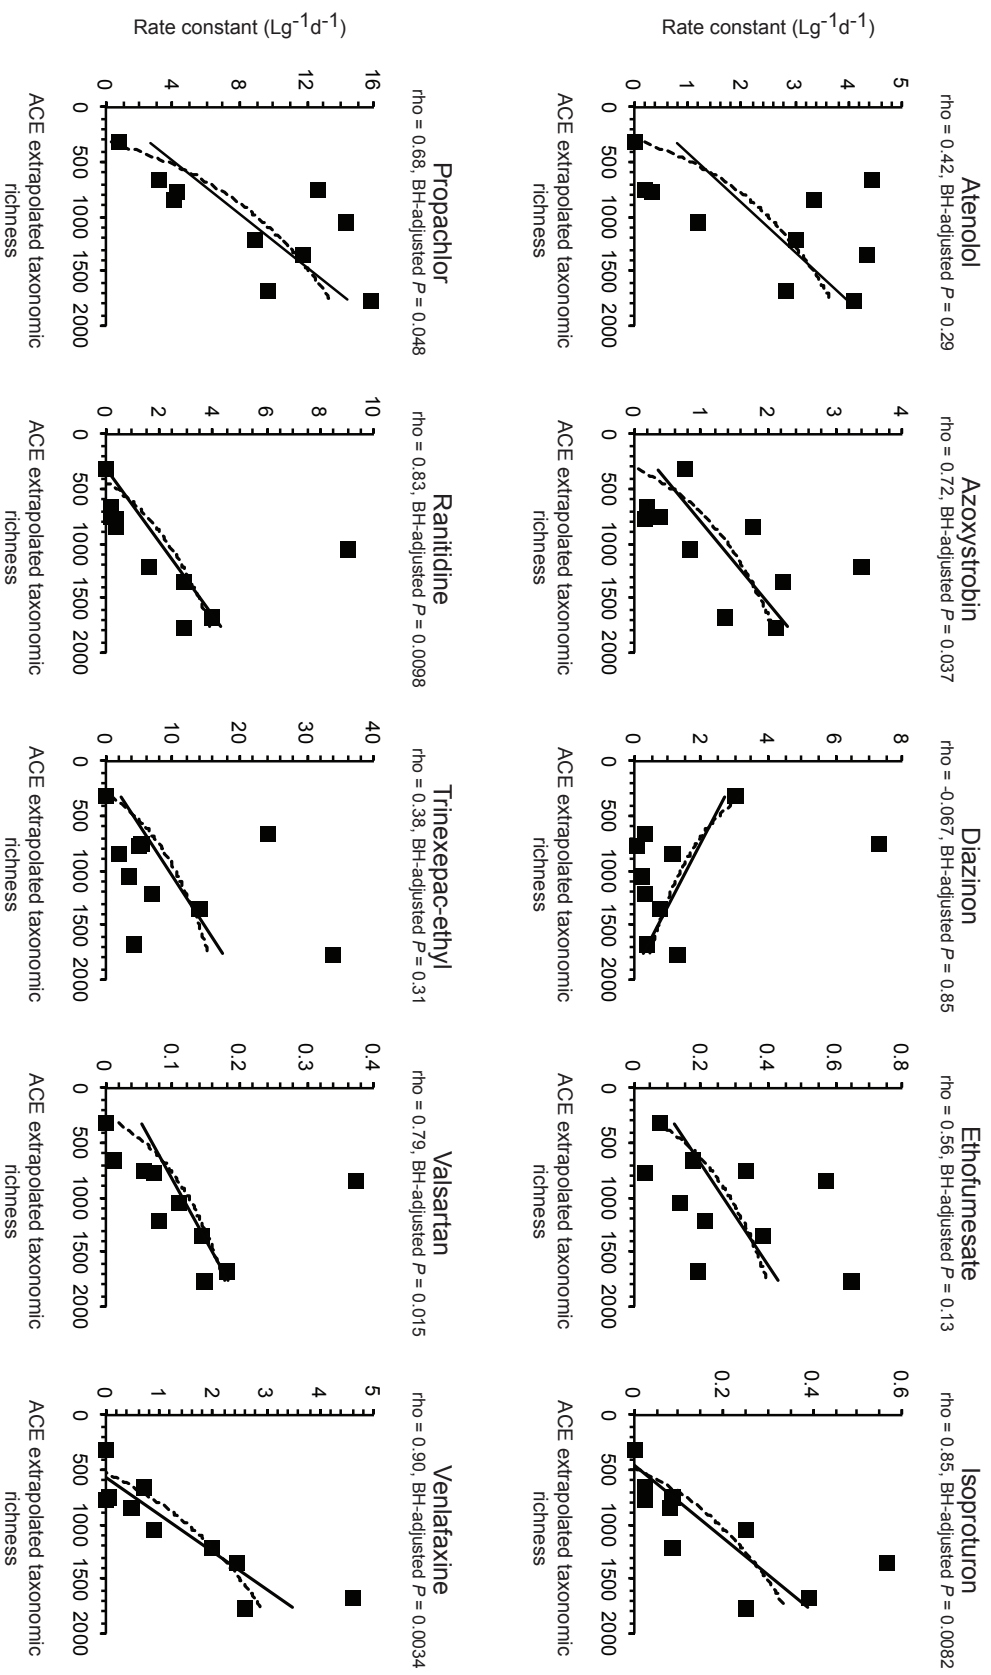

**Figure S3.** Associations between the ACE extrapolated taxonomic richness measurements and the active biomass-normalized first-order rate constants for each individual micropollutant biotransformation. Each square symbol indicates the measurements for one independent WWTP community. The solid lines are the best-fit linear models and the dashed lines are the best-fit logarithmic models. Definitions:  $\rho$ , Spearman rank correlation coefficient; BH-adjusted  $P$ , Benjamini-Hochberg-adjusted two-sided  $P$ .

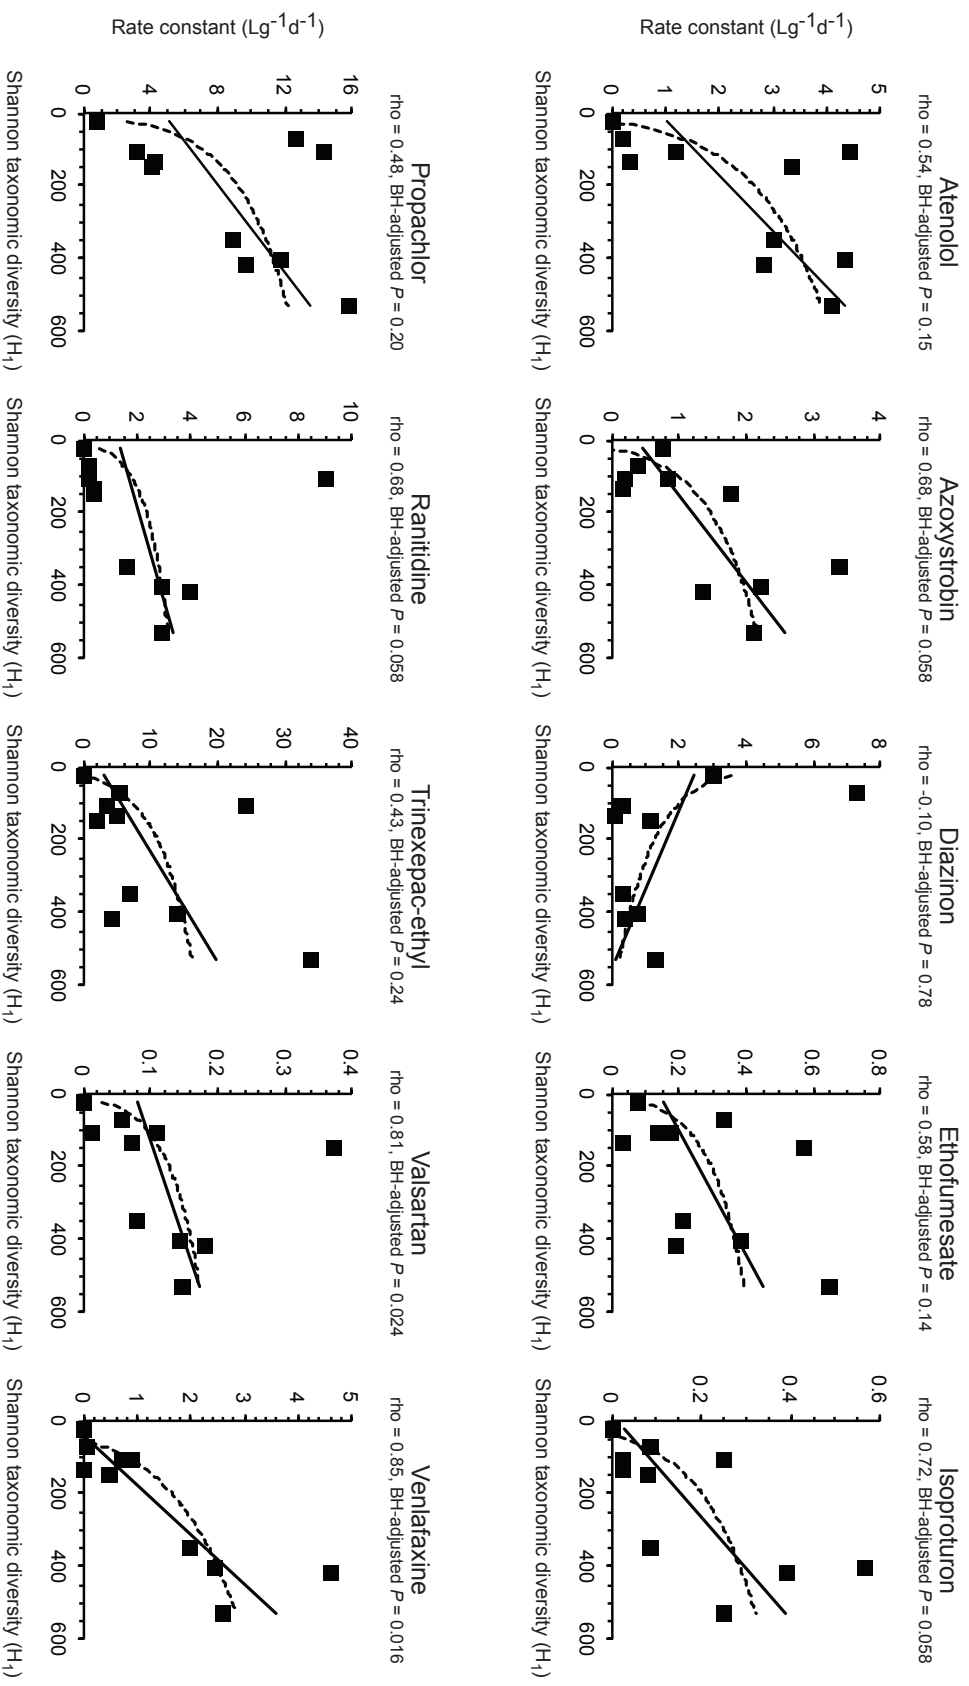

**Figure S4.** Associations between the Shannon taxonomic diversity measurements and the active biomass-normalized first-order rate constants for each individual micropollutant biotransformation. Each square symbol indicates the measurements for one independent WWTP community. Shannon taxonomic diversity is reported in terms of the Hill number  $H_1$ . The solid lines indicate the best-fit linear models and the dashed lines are the best-fit logarithmic models. Definitions:  $\rho$ , Spearman rank correlation coefficient; BH-adjusted  $P$ , Benjamini-Hochberg-adjusted two-sided  $P$ .

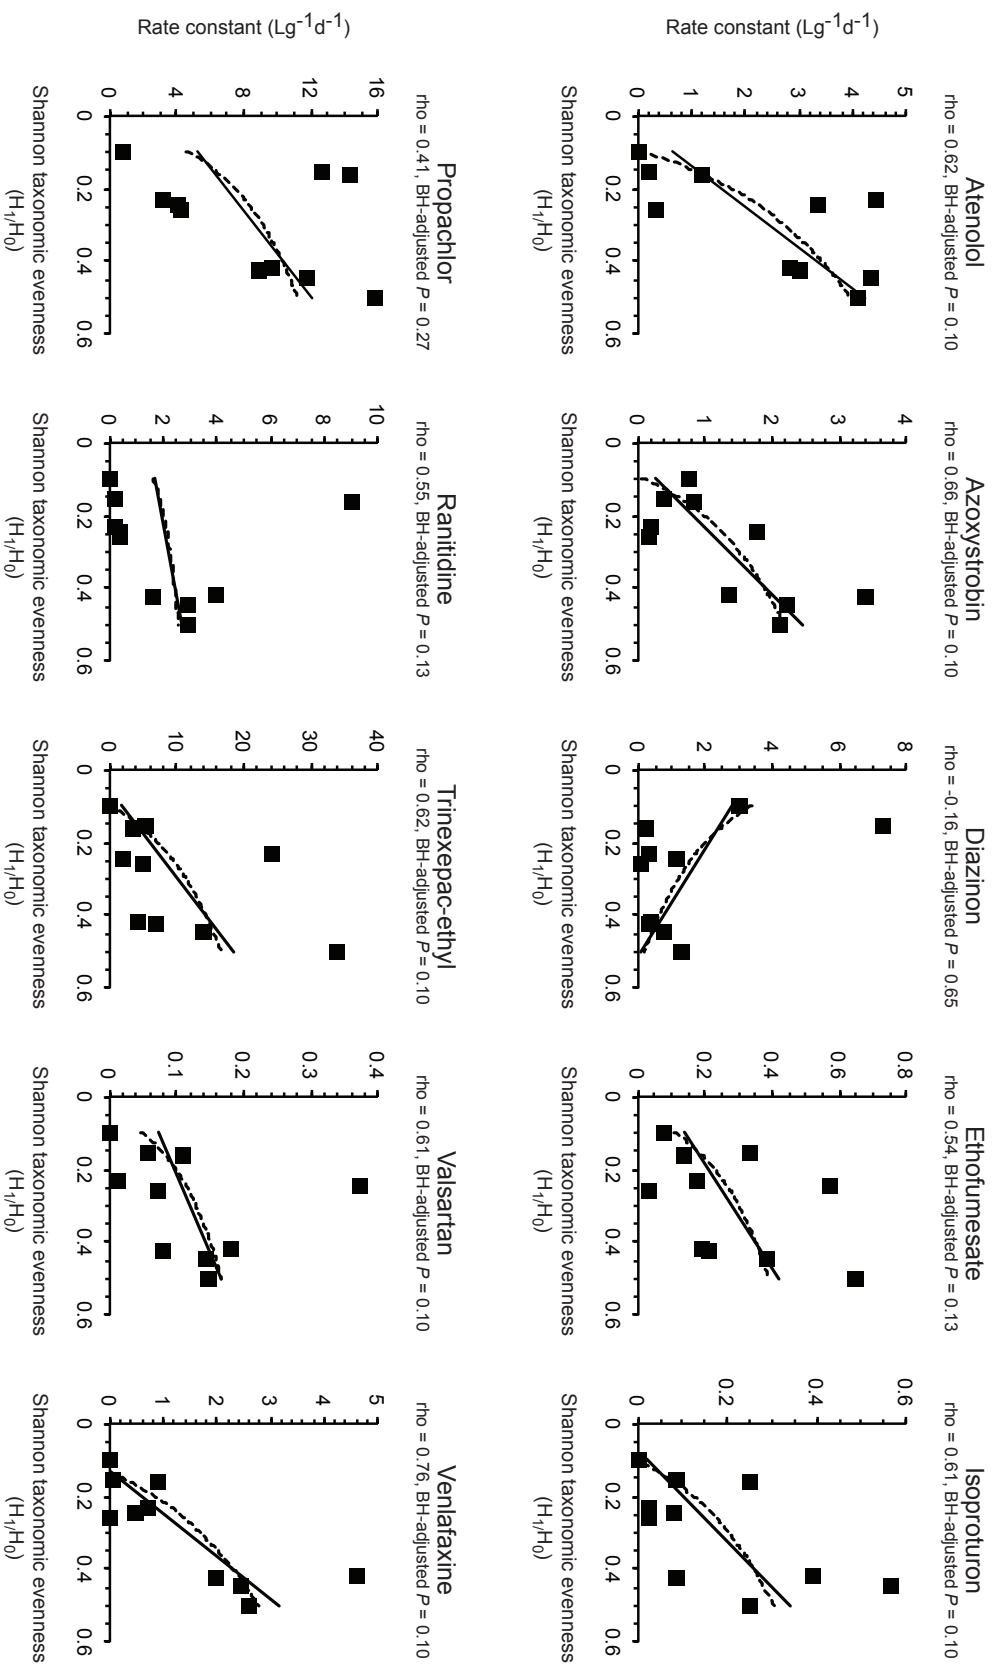

**Figure S5.** Associations between the Shannon taxonomic evenness measurements and the active biomass-normalized first-order rate constants for each individual micropollutant biotransformation. Each square symbol indicates the measurements for one independent WWTP community. Shannon taxonomic evenness is reported in terms of the Hill numbers  $H_1$  and  $H_0$ . The solid lines are the best-fit linear models and the dashed lines are the best-fit logarithmic models. Definitions:  $\rho$ , Spearman rank correlation coefficient; BH-adjusted  $P$ , Benjamin-Hochberg-adjusted two-sided  $P$ .

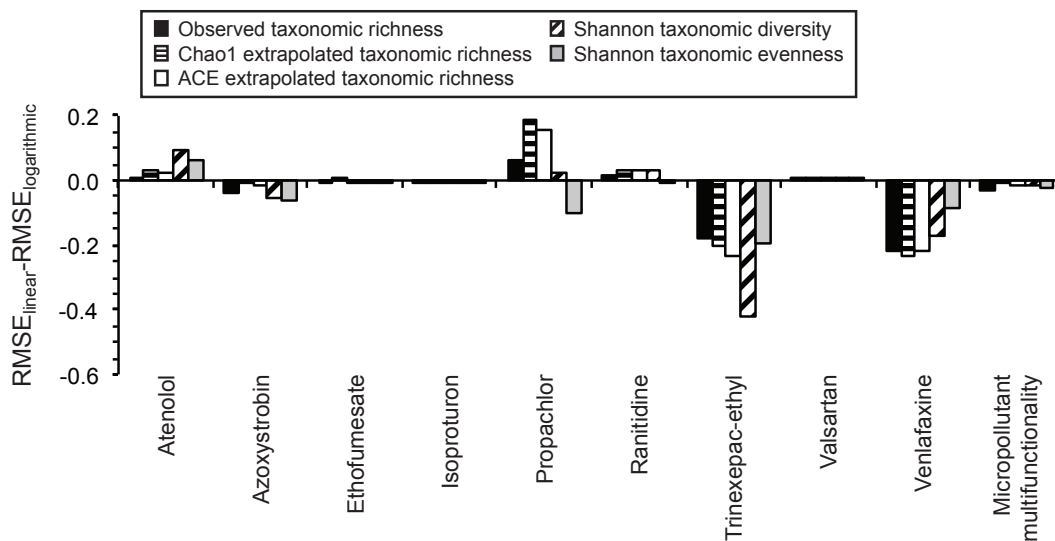

**Figure S6.** The difference between the root mean squared errors for the best-fit linear and best-fit logarithmic models ( $RMSE_{linear} - RMSE_{logarithmic}$ ) between biodiversity (independent variable  $x$ ) and the rates of individual micropollutant biotransformations or micropollutant multifunctionality (dependent variable  $y$ ).

**Table S1.** <sup>a,b</sup>Active biomass-normalized first-order rate constants ( $Lg^{-1}d^{-1}$ ) for each micropollutant biotransformation.

| Micropollutant  | Name of full-scale wastewater treatment plant |        |       |        |       |        |        |       |        |         |
|-----------------|-----------------------------------------------|--------|-------|--------|-------|--------|--------|-------|--------|---------|
|                 | DOM1                                          | DOM2   | DOM3  | DOM4   | DOM5  | IND1   | IND2   | IND3  | IND4   | IND5    |
| atenolol        | 4.33                                          | 3.00   | 4.10  | 0.355  | 2.85  | 4.41   | 3.36   | 1.20  | 0.187  | 0.00322 |
| azoxystrobin    | 2.24                                          | 3.39   | 2.11  | 0.166  | 1.37  | 0.199  | 1.78   | 0.818 | 0.398  | 0.747   |
| diazinon        | 0.741                                         | 0.313  | 1.29  | 0.114  | 0.384 | 0.310  | 1.15   | 0.212 | 7.28   | 3.02    |
| ethofumesate    | 0.388                                         | 0.209  | 0.647 | 0.0286 | 0.187 | 0.175  | 0.570  | 0.137 | 0.334  | 0.0756  |
| isoproturon     | 0.564                                         | 0.0850 | 0.251 | 0.0226 | 0.389 | 0.0216 | 0.0803 | 0.251 | 0.0864 | 0.00342 |
| propachlor      | 11.8                                          | 8.85   | 15.8  | 4.23   | 9.65  | 3.18   | 4.09   | 14.4  | 12.7   | 0.722   |
| ranitidine      | 2.94                                          | 1.61   | 2.90  | 0.362  | 3.99  | 0.205  | 0.357  | 9.04  | 0.237  | 0.0235  |
| trinexpac-ethyl | 13.8                                          | 6.84   | 34.0  | 5.06   | 4.06  | 24.0   | 1.99   | 3.26  | 5.28   | 0.226   |
| valsartan       | 0.145                                         | 0.0786 | 0.149 | 0.0746 | 0.182 | 0.0141 | 0.372  | 0.112 | 0.0566 | 0.00212 |
| venlafaxine     | 2.44                                          | 2.00   | 2.60  | 0.0296 | 4.64  | 0.707  | 0.471  | 0.896 | 0.0772 | 0.00890 |

<sup>a</sup>Active biomass was estimated using the method described by Majewsky and colleagues (1). <sup>b</sup>The observed first-order rate constants were previously reported by Helbing and colleagues (2).

**Table S2.** Measured operational and environmental metrics for each full-scale wastewater treatment plant.

| Operational or environmental metric      | Name of full-scale wastewater treatment plant |       |      |       |       |      |      |       |      |      |
|------------------------------------------|-----------------------------------------------|-------|------|-------|-------|------|------|-------|------|------|
|                                          | DOM1                                          | DOM2  | DOM3 | DOM4  | DOM5  | IND1 | IND2 | IND3  | IND4 | IND5 |
| temperature, [°C]                        | 9                                             | 12    | 17   | 11    | 8     | 25   | 29   | 35    | 24   | 41   |
| pH                                       | 7.6                                           | 7.6   | 7.5  | 8.1   | 8.1   | 7    | 7.3  | 6.2   | 7    | 8.1  |
| dissolved oxygen, [mg/L]                 | 1.7                                           | 1.7   | 0.8  | 6.2   | 2.4   | 2.8  | 1.5  | 4.8   | 3.4  | 1    |
| total suspended solids, [g/L]            | 3                                             | 3     | 12.4 | 2.3   | 2.2   | 6.8  | 4.7  | 6.9   | 6    | 9.6  |
| total daily flow rate, [m <sup>3</sup> ] | 1622                                          | 17358 | 962  | 16375 | 10314 | 9119 | 8113 | 21360 | 5720 | 5800 |
| hydraulic retention time, [hour]         | 4                                             | 2.8   | 24   | 5.9   | 20    | 14   | 17   | 21.3  | 35.7 | 20   |
| solids retention time, [day]             | 5.1                                           | 5.4   | 9.8  | 2.6   | 20.5  | 9.5  | 12   | 6.1   | 99.6 | 5    |
| influent ammonia-nitrogen, [mg/L]        | 18.6                                          | 3.3   | 24.9 | 10    | 26.2  | 23   | 86   | n.a.  | 86.2 | 100  |
| influent ammonia-nitrogen, [mg/L]        | 0.1                                           | 0.2   | 0    | 5     | 0.1   | 0.9  | 2    | n.a.  | 57.2 | 62   |
| influent total phosphorous, [mg/L]       | 5                                             | 2     | 9    | 3     | 5     | 3    | 6    | n.a.  | n.a. | 22   |
| influent total phosphorous, [mg/L]       | 1.3                                           | 0.1   | 0.4  | 0.1   | 0.1   | n.a. | 1.6  | n.a.  | n.a. | 17.6 |
| influent BOD <sub>5</sub> , [mg/L]       | 203                                           | 54    | 320  | 160   | n.a.  | 500  | n.a. | 1892  | 650  | 3000 |
| effluent BOD <sub>5</sub> , [mg/L]       | 8                                             | 3     | 1    | 10    | n.a.  | n.a. | n.a. | 25    | 8    | 159  |
| influent <sup>d</sup> COD, [mg/L]        | 310                                           | 96    | n.a. | 332   | n.a.  | 846  | 820  | 1873  | 1565 | n.a. |
| effluent COD, [mg/L]                     | 34                                            | 42    | n.a. | 19    | n.a.  | 165  | n.a. | 219   | 208  | n.a. |

<sup>a</sup>All operational and environmental metrics were previously reported by Helbling and colleagues (2). <sup>b</sup>n.a., data was not available from the wastewater treatment plant. <sup>c</sup>BOD<sub>5</sub>, 5-day biological oxygen demand. <sup>d</sup>COD, chemical oxygen demand.



**Table S3.** Experimentally observed biotransformation types and biotransformation products for each micropollutant.

| Micropollutant   | Predominant use | <sup>a</sup> Experimentally observed biotransformation types |                                                     |
|------------------|-----------------|--------------------------------------------------------------|-----------------------------------------------------|
|                  |                 | Experimentally observed biotransformation products           | Experimentally observed biotransformation products  |
| atenolol         | pharmaceutical  | amide hydrolysis                                             | atenolol acid                                       |
| azoxystrobin     | pesticide       | carboxylic acid ester hydrolysis                             | azoxystrobin acid                                   |
| diazinon         | pesticide       | aromatic thiophosphate hydrolysis                            | pyrimidinol                                         |
| ethofumesate     | pesticide       | ether dealkylation                                           | 2-keto-ethofumesate                                 |
| isoproturon      | pesticide       | urea dealkylation and urea di-dealkylation                   | N-demethyl isoproturon and N-didemethyl isoproturon |
| propachlor       | pesticide       | glutathione coupling and hydrolysis oxidation                | propachlor-ESA and propachlor-OXA                   |
| ranitidine       | pharmaceutical  | S-oxidation and N-oxidation                                  | ranitidine-S-oxide and ranitidine-N-oxide           |
| trinexepac-ethyl | pesticide       | carboxylic acid ester hydrolysis                             | trinexepac-acid                                     |
| valsartan        | pharmaceutical  | amide dealkylation                                           | valsartan acid                                      |
| venlafaxine      | pharmaceutical  | amine dealkylation and ether dealkylation                    | N-demethyl venlafaxine and O-demethyl venlafaxine   |

<sup>a</sup>All experimentally observed biotransformation types and biotransformation products were previously reported by Helbing and colleagues (2).

**Table S4.** Micropollutant multifunctionality measurements for each full-scale wastewater treatment plant community.

| Measurement                                    | Name of full-scale wastewater treatment plant |        |       |        |       |        |       |       |        |        |
|------------------------------------------------|-----------------------------------------------|--------|-------|--------|-------|--------|-------|-------|--------|--------|
|                                                | DOM1                                          | DOM2   | DOM3  | DOM4   | DOM5  | IND1   | IND2  | IND3  | IND4   | IND5   |
| <sup>a</sup> micropollutant multifunctionality | 0.649                                         | 0.0590 | 0.879 | -0.809 | 0.362 | -0.364 | 0.132 | 0.060 | -0.144 | -0.823 |

<sup>a</sup>Micropollutant multifunctionality was measured using the active biomass-normalized first-order rate constants for each micropollutant biotransformation and the method described by Zavaleta and colleagues (3).

**Table S5.** Linear and logarithmic models for describing the observed positive associations between biodiversity (independent variable  $x$ ) and the rates of individual or the collective rates of multiple micropollutant biotransformations (dependent variable  $y$ ).

| Micropollutant | Biodiversity measurement              | Best-fit           |                       |                                   | Best-fit            |                            |                                    |
|----------------|---------------------------------------|--------------------|-----------------------|-----------------------------------|---------------------|----------------------------|------------------------------------|
|                |                                       | linear model       | $R^2_{\text{linear}}$ | $b_{\text{RMSE}_{\text{linear}}}$ | logarithmic model   | $R^2_{\text{logarithmic}}$ | $\text{RMSE}_{\text{logarithmic}}$ |
| atenofool      | observed taxonomic richness           | $y=0.0041x-0.42$   | 0.381                 | 1.48                              | $y=2.4\ln(x)-13$    | 0.387                      | 1.48                               |
|                | Chao1 extrapolated taxonomic richness | $y=0.0014x+0.078$  | 0.328                 | 1.54                              | $y=2.1\ln(x)-13$    | 0.358                      | 1.51                               |
|                | ACE extrapolated taxonomic richness   | $y=0.0022x+0.075$  | 0.323                 | 1.55                              | $y=2.1\ln(x)-12$    | 0.341                      | 1.53                               |
|                | Shannon taxonomic diversity           | $y=0.0066x+0.87$   | 0.426                 | 1.43                              | $y=1.3\ln(x)-4.1$   | 0.497                      | 1.34                               |
|                | Shannon taxonomic evenness            | $y=8.9x-0.23$      | 0.506                 | 1.32                              | $y=2.4\ln(x)+5.7$   | 0.549                      | 1.26                               |
| azoxystrobin   | observed taxonomic richness           | $y=0.0024x-0.40$   | 0.409                 | 0.859                             | $y=1.4\ln(x)-7.4$   | 0.351                      | 0.900                              |
|                | Chao1 extrapolated taxonomic richness | $y=0.00082x+0.027$ | 0.295                 | 0.938                             | $y=1.1\ln(x)-6.8$   | 0.285                      | 0.945                              |
|                | ACE extrapolated taxonomic richness   | $y=0.0013x-0.086$  | 0.343                 | 0.906                             | $y=1.2\ln(x)-6.8$   | 0.321                      | 0.921                              |
|                | Shannon taxonomic diversity           | $y=0.0042x+0.36$   | 0.495                 | 0.794                             | $y=0.71\ln(x)-2.3$  | 0.428                      | 0.846                              |
|                | Shannon taxonomic evenness            | $y=5.4x-0.27$      | 0.536                 | 0.761                             | $y=1.3\ln(x)+3.1$   | 0.455                      | 0.825                              |
| diazinon       | observed taxonomic richness           | $y=-0.0034x+3.8$   | 0.164                 | 2.15                              | $y=-2.0\ln(x)+14$   | 0.175                      | 2.13                               |
|                | Chao1 extrapolated taxonomic richness | $y=-0.0010x+3.1$   | 0.107                 | 2.22                              | $y=-1.5\ln(x)+13$   | 0.120                      | 2.20                               |
|                | ACE extrapolated taxonomic richness   | $y=-0.0017x+3.3$   | 0.123                 | 2.20                              | $y=-1.6\ln(x)+13$   | 0.136                      | 2.18                               |
|                | Shannon taxonomic diversity           | $y=-0.0046x+2.5$   | 0.136                 | 2.18                              | $y=-1.1\ln(x)+6.9$  | 0.218                      | 2.08                               |
|                | Shannon taxonomic evenness            | $y=-6.8x+3.5$      | 0.188                 | 2.12                              | $y=-2.0\ln(x)-1.2$  | 0.236                      | 2.05                               |
| ethofumesate   | observed taxonomic richness           | $y=0.00037x+0.025$ | 0.227                 | 0.192                             | $y=0.21\ln(x)-1.1$  | 0.219                      | 0.193                              |
|                | Chao1 extrapolated taxonomic richness | $y=0.00015x+0.043$ | 0.247                 | 0.190                             | $y=0.20\ln(x)-1.2$  | 0.249                      | 0.190                              |
|                | ACE extrapolated taxonomic richness   | $y=0.00020x+0.050$ | 0.229                 | 0.192                             | $y=0.20\ln(x)-1.1$  | 0.226                      | 0.193                              |
|                | Shannon taxonomic diversity           | $y=0.00057x+0.14$  | 0.253                 | 0.189                             | $y=0.10\ln(x)-0.24$ | 0.227                      | 0.192                              |
|                | Shannon taxonomic evenness            | $y=0.70x+0.071$    | 0.230                 | 0.192                             | $y=0.18\ln(x)+0.51$ | 0.213                      | 0.194                              |
| isoprotruron   | observed taxonomic richness           | $y=0.00052x-0.18$  | 0.559                 | 0.131                             | $y=0.28\ln(x)-1.6$  | 0.487                      | 0.141                              |
|                | Chao1 extrapolated taxonomic richness | $y=0.00019x-0.13$  | 0.538                 | 0.134                             | $y=0.26\ln(x)-1.7$  | 0.496                      | 0.140                              |
|                | ACE extrapolated taxonomic richness   | $y=0.00030x-0.14$  | 0.540                 | 0.133                             | $y=0.26\ln(x)-1.6$  | 0.498                      | 0.140                              |
|                | Shannon taxonomic diversity           | $y=0.00071x+0.012$ | 0.460                 | 0.145                             | $y=0.12\ln(x)-4.5$  | 0.415                      | 0.150                              |
|                | Shannon taxonomic evenness            | $y=0.80x-0.058$    | 0.369                 | 0.156                             | $y=0.19\ln(x)+0.44$ | 0.323                      | 0.162                              |
| propachlor     | observed taxonomic richness           | $y=0.014x-0.74$    | 0.487                 | 3.96                              | $y=8.0\ln(x)-43$    | 0.502                      | 3.90                               |
|                | Chao1 extrapolated taxonomic richness | $y=0.00553x+0.12$  | 0.510                 | 3.87                              | $y=7.7\ln(x)-48$    | 0.557                      | 3.68                               |
|                | ACE extrapolated taxonomic richness   | $y=0.0082x-0.029$  | 0.519                 | 3.84                              | $y=7.8\ln(x)-45$    | 0.558                      | 3.68                               |
|                | Shannon taxonomic diversity           | $y=0.017x+4.7$     | 0.318                 | 4.57                              | $y=3.0\ln(x)-6.9$   | 0.325                      | 4.54                               |

|                            |                                       |                     |       |                    |                       |       |       |
|----------------------------|---------------------------------------|---------------------|-------|--------------------|-----------------------|-------|-------|
| ranitidine                 | Shannon taxonomic evenness            | $y=17x+3.6$         | 0.213 | 4.91               | $y=4.1\ln(x)+0.14$    | 0.181 | 5.01  |
|                            | observed taxonomic richness           | $y=0.0049x-1.2$     | 0.220 | 2.63               | $y=2.9\ln(x)-17$      | 0.229 | 2.61  |
|                            | Chao1 extrapolated taxonomic richness | $y=0.0019x-0.85$    | 0.227 | 2.62               | $y=2.7\ln(x)-18$      | 0.243 | 2.59  |
|                            | ACE extrapolated taxonomic richness   | $y=0.0030x-0.93$    | 0.233 | 2.61               | $y=2.8\ln(x)-17$      | 0.251 | 2.57  |
|                            | Shannon taxonomic diversity           | $y=0.0039x+1.3$     | 0.060 | 2.88               | $y=0.83\ln(x)-2.0$    | 0.082 | 2.85  |
| trinexepac-ethyl           | Shannon taxonomic evenness            | $y=2.5x+1.4$        | 0.016 | 2.95               | $y=0.58\ln(x)+3.0$    | 0.013 | 2.95  |
|                            | observed taxonomic richness           | $y=0.018x-2.2$      | 0.186 | 10.5               | $y=9.5\ln(x)-51$      | 0.158 | 10.7  |
|                            | Chao1 extrapolated taxonomic richness | $y=0.0070x-1.3$     | 0.203 | 10.4               | $y=9.0\ln(x)-56$      | 0.171 | 10.6  |
|                            | ACE extrapolated taxonomic richness   | $y=0.011x-1.1$      | 0.195 | 10.4               | $y=8.7\ln(x)-50$      | 0.159 | 10.7  |
|                            | Shannon taxonomic diversity           | $y=0.033x+2.3$      | 0.284 | 9.84               | $y=5.3\ln(x)-17$      | 0.221 | 10.3  |
| valsartan                  | Shannon taxonomic evenness            | $y=42x-2.3$         | 0.288 | 9.81               | $y=10\ln(x)+2.4$      | 0.260 | 10.0  |
|                            | observed taxonomic richness           | $y=0.00016x+0.0083$ | 0.165 | 0.103              | $y=0.11\ln(x)-0.56$   | 0.207 | 0.101 |
|                            | Chao1 extrapolated taxonomic richness | $y=0.000061x+0.021$ | 0.164 | 0.103              | $y=0.097\ln(x)-0.59$  | 0.211 | 0.100 |
|                            | ACE extrapolated taxonomic richness   | $y=0.000090x+0.025$ | 0.148 | 0.104              | $y=0.094\ln(x)-0.52$  | 0.195 | 0.101 |
|                            | Shannon taxonomic diversity           | $y=0.00018x+0.077$  | 0.092 | 0.108              | $y=0.0046\ln(x)-0.12$ | 0.179 | 0.102 |
| venlafaxine                | Shannon taxonomic evenness            | $y=0.23x+0.051$     | 0.095 | 0.107              | $y=0.074\ln(x)+0.22$  | 0.141 | 0.105 |
|                            | observed taxonomic richness           | $y=0.0050x-2.0$     | 0.765 | 0.776              | $y=2.6\ln(x)-15$      | 0.614 | 0.995 |
|                            | Chao1 extrapolated taxonomic richness | $y=0.0019x-1.7$     | 0.794 | 0.727              | $y=2.4\ln(x)-16$      | 0.641 | 0.960 |
|                            | ACE extrapolated taxonomic richness   | $y=0.0029x-1.7$     | 0.786 | 0.741              | $y=2.4\ln(x)-15$      | 0.640 | 0.961 |
|                            | Shannon taxonomic diversity           | $y=0.0074x-0.030$   | 0.742 | 0.814              | $y=1.2\ln(x)-4.8$     | 0.624 | 0.982 |
| multifunctionality         | Shannon taxonomic evenness            | $y=8.5x-1.1$        | 0.639 | 0.962              | $y=2.1\ln(x)+4.2$     | 0.574 | 1.05  |
|                            | observed taxonomic richness           | $y=0.0019x-1.3$     | 0.779 | 0.280              | $y=1.0\ln(x)-6.7$     | 0.726 | 0.311 |
|                            | Chao1 extrapolated taxonomic richness | $y=0.00071x-1.1$    | 0.780 | 0.279              | $y=0.97\ln(x)-7.1$    | 0.763 | 0.290 |
|                            | ACE extrapolated taxonomic richness   | $y=0.0011x-1.1$     | 0.772 | 0.284              | $y=0.97\ln(x)-6.6$    | 0.747 | 0.300 |
|                            | Shannon taxonomic diversity           | $y=0.0026x-0.61$    | 0.694 | 0.329              | $y=0.47\ln(x)-2.4$    | 0.658 | 0.348 |
| Shannon taxonomic evenness | $y=3.06x-0.90$                        | 0.595               | 0.379 | $y=0.76\ln(x)+1.0$ | 0.544                 | 0.402 |       |

<sup>a</sup>R<sup>2</sup>, coefficient of determination. <sup>b</sup>RMSF; root mean squared error.

**Table S6.** Bacterial enzymes that are predicted to catalyze each of the experimentally observed micropollutant biotransformations.

| Micropollutant | <sup>a</sup> Experimentally observed |             | <sup>b</sup> Predicted bacterial enzymes                       | <sup>b</sup> EC number                  |
|----------------|--------------------------------------|-------------|----------------------------------------------------------------|-----------------------------------------|
|                | biotransformations                   |             |                                                                |                                         |
| atenolol       | amide hydrolysis                     |             | amidase<br>atenolol amidohydrolase<br>bromoxynil nitrilase     | EC 3.5.1.4<br>EC 3.5.1.1-<br>EC 3.5.5.6 |
|                |                                      |             | <i>cis</i> -aconitamide amidase                                | EC 3.5.1.1-                             |
| azoxystrobin   | carboxylic acid ester hydrolysis     |             | 1-hydroxy-2-oxolinonene 1,2-monoxygenase                       | EC 1.14.13.1-                           |
|                |                                      |             | 1-oxa-2-oxocycloheptane lactonase                              | EC 3.1.1.1-                             |
|                |                                      |             | 2-hydroxy-6-oxo-6-(2-hydroxyphenoxy)hexa-2,4-dienoate esterase | EC 3.1.1.1-                             |
|                |                                      |             | 2-pyrone-4,6-dicarboxylate hydrolase                           | EC 3.1.1.57                             |
|                |                                      |             | 4-hydroxyphenyl 4-hydroxybenzoate hydrolase                    | EC 3.1.1.1-                             |
|                |                                      |             | 4-pyridoxolactonase                                            | EC 3.1.1.27                             |
|                |                                      |             | 4-sulfophenol acetate esterase                                 | EC 3.1.1.1-                             |
|                |                                      |             | 5-pyridoxolactonase                                            | EC 3.1.1.6                              |
|                |                                      |             | acetylsterase                                                  | EC 3.1.1.2                              |
|                |                                      |             | arylesterase                                                   | EC 3.1.1.1-                             |
|                |                                      |             | butyrolactone hydrolase                                        | EC 3.1.1.1                              |
|                |                                      |             | carboxylesterase                                               | EC 3.1.1.1-                             |
|                |                                      |             | CHMOD hydrolase                                                | EC 3.1.1.84                             |
|                |                                      |             | cocaine esterase                                               | EC 3.1.1.1-                             |
|                |                                      |             | diethylsuccinate esterase                                      | EC 3.1.1.1-                             |
|                |                                      |             | dihydrocoumarin hydrolase                                      | EC 3.1.1.1-                             |
|                |                                      |             | dimethyl isophthalate esterase                                 | EC 3.1.1.1-                             |
|                |                                      |             | eggonine methyl esterase                                       | EC 3.1.1.1-                             |
|                |                                      |             | endosulfan lactone lactonase                                   | EC 3.1.1.1-                             |
|                | ethylsuccinate esterase              | EC 3.1.1.1- |                                                                |                                         |
|                | isopropyl salicylate esterase        | EC 3.1.1.1- |                                                                |                                         |
|                | malathion esterase                   | EC 3.1.1.1- |                                                                |                                         |
|                | malathion monocarboxylate esterase   | EC 3.1.1.1- |                                                                |                                         |
|                | monomethyl isophthalate esterase     | EC 3.1.1.1- |                                                                |                                         |
|                | pyrethroid hydrolase                 | EC 3.1.1.88 |                                                                |                                         |

|               |                                                           |                                                                                                                                                                                                                                                                                                                                                                                                                                                                                                                                                                                                                                      |                                                                                                                                                                                     |
|---------------|-----------------------------------------------------------|--------------------------------------------------------------------------------------------------------------------------------------------------------------------------------------------------------------------------------------------------------------------------------------------------------------------------------------------------------------------------------------------------------------------------------------------------------------------------------------------------------------------------------------------------------------------------------------------------------------------------------------|-------------------------------------------------------------------------------------------------------------------------------------------------------------------------------------|
|               |                                                           | tropinesterase                                                                                                                                                                                                                                                                                                                                                                                                                                                                                                                                                                                                                       | EC 3.1.1.10                                                                                                                                                                         |
| diazinon      | aromatic thiophosphate hydrolysis                         | aryldialkylphosphatase<br>isocarbophos phosphodiesterase<br>triazophos phosphodiesterase                                                                                                                                                                                                                                                                                                                                                                                                                                                                                                                                             | EC 3.1.8.1<br>EC 3.1.4.-<br>EC 3.1.4.-                                                                                                                                              |
| cethofumesate | ether dealkylation                                        | 2,4-dichlorophenoxyacetate alpha-ketoglutarate dioxygenase<br>2,4,5-trichlorophenoxyacetic acid oxygenase<br>3-methylgallate O-demethylase<br>4-chlorophenoxyacetate monooxygenase<br>4-methoxybenzoate monooxygenase<br>tetrahydrofolate-dependent O-demethylase<br>vanillate monooxygenase<br>vanillate O-demethylase                                                                                                                                                                                                                                                                                                              | EC 1.14.11.-<br>EC 1.14.13.-<br>EC 2.1.1.-<br>EC 1.14.-<br>EC 1.14.99.15<br>EC 2.1.1.-<br>EC 1.14.13.82<br>EC 2.1.1.-                                                               |
| isoproturon   | urea dealkylation and urea di-dealkylation                | 2-hydroxy-2',6'-diethyl-N-acetanilide hydrolase<br>alachlor hydrolase<br>caffeine demethylase<br>heteroxanthine demethylase<br>hydroxymonomethylisoproturon dimethylaminohydrogenase<br>isoproturon dimethylaminohydrogenase<br>monodemethylisoproturon dimethylaminohydrogenase<br>N-isopropylacetaniline monooxygenase<br>paraxanthine demethylase<br>theobromine demethylase                                                                                                                                                                                                                                                      | EC 3.3.2.-<br>EC 3.3.2.-<br>EC 1.13.12.-<br>EC 1.14.13.128<br>EC 1.5.99.-<br>EC 1.5.99.-<br>EC 1.5.99.-<br>EC 1.14.-<br>EC 1.13.12.-<br>EC 1.13.12.-                                |
| propachlor    | glutathione coupling, dehalogenation and halosubstitution | 1,1-dichloroethane reductive dehalogenase<br>1,1,1-trichloroethane reductive dehalogenase<br>1,2-dichloroethene reductive dehalogenase<br>1,2,4-trichlorobenzene reductive dehalogenase<br>1,4-dichlorobenzene reductive dehalogenase<br>2-chloro-N-isopropylacetanilide reductive dehalogenase<br>2-chlorobenzoate reductive dehalogenase<br>2,4-dichloroaniline reductive dehalogenase<br>2,4-dichlorobenzoyl-CoA reductase<br>2,4-dichlorophenoxyacetate reductive dehalogenase<br>2,5-dichlorohydroquinone reductive dechlorinase<br>2,6-dichlorobenzamide reductive dehalogenase<br>2,6-dichlorobenzoate reductive dehalogenase | EC 1.97.1-<br>EC 1.97.1-<br>EC 1.97.1-<br>EC 1.97.1-<br>EC 1.97.1-<br>EC 1.97.1-<br>EC 1.97.1-<br>EC 1.97.1-<br>EC 1.3.1.63<br>EC 1.97.1-<br>EC 1.97.1-<br>EC 1.97.1-<br>EC 1.97.1- |

|                  |                                  |                                                                |              |
|------------------|----------------------------------|----------------------------------------------------------------|--------------|
|                  |                                  | 3-monobromobisphenol A reductive dehalogenase                  | EC 1.97.1-   |
|                  |                                  | 3,3'-dibromobisphenol A reductive dehalogenase                 | EC 1.97.1-   |
|                  |                                  | 3,3',5'-tribromobisphenol A reductive dehalogenase             | EC 1.97.1-   |
|                  |                                  | 3,3',5',5'-tetrabromobisphenol A reductive dehalogenase        | EC 1.97.1-   |
|                  |                                  | carbon tetrachloride reductive dehalogenase                    | EC 1.97.1-   |
|                  |                                  | chloroform reductive dehalogenase                              | EC 1.97.1-   |
|                  |                                  | DDE reductive dehalogenase                                     | EC 1.97.1-   |
|                  |                                  | DDT reductive dehalogenase                                     | EC 1.97.1-   |
|                  |                                  | dichloromethane reductive dehalogenase                         | EC 1.97.1-   |
|                  |                                  | maleylacetate reductase                                        | EC 1.3.1.32  |
|                  |                                  | methyl chloride reductive dehalogenase                         | EC 1.97.1-   |
|                  |                                  | tetrachloroethene reductive dehalogenase                       | EC 1.97.1.8  |
|                  |                                  | tetrachlorohydroquinone reductive dehalogenase                 | EC 1.8.99.-  |
|                  |                                  | vinyl chloride reductive dehalogenase                          | EC 1.97.1-   |
|                  |                                  | 2-haloacid dehalogenase                                        | EC 3.8.1.2   |
|                  |                                  | DDMS dehalogenase                                              | EC 3.8.1.-   |
|                  |                                  | dichloroacetate halidohydrolase                                | EC 3.8.1.-   |
|                  |                                  | haloacetate dehalogenase                                       | EC 3.8.1.3   |
|                  |                                  | haloalkane dehalogenase                                        | EC 3.8.1.5   |
| ranitidine       | S-oxidation and N-oxidation      | 2-(methylthio)benzothiazole monooxygenase                      | EC 1.14.-    |
|                  |                                  | benzothioephene monooxygenase                                  | EC 1.14.13.- |
|                  |                                  | DBT monooxygenase                                              | EC 1.14.13.- |
|                  |                                  | phorate monooxygenase                                          | EC 1.10.3.2  |
| trimezepac-ethyl | carboxylic acid ester hydrolysis | 1-hydroxy-2-oxolinonene 1,2-monooxygenase                      | EC 1.14.13.- |
|                  |                                  | 1-oxa-2-oxocycloheptane lactonase                              | EC 3.1.1.-   |
|                  |                                  | 2-hydroxy-6-oxo-6-(2-hydroxyphenoxy)hexa-2,4-dienoate esterase | EC 3.1.1.-   |
|                  |                                  | 2-pyrone-4,6-dicarboxylate hydrolase                           | EC 3.1.1.57  |
|                  |                                  | 4-hydroxyphenyl 4-hydroxybenzoate hydrolase                    | EC 3.1.1.-   |
|                  |                                  | 4-pyridoxolactonase                                            | EC 3.1.1.27  |
|                  |                                  | 4-sulfophenol acetate esterase                                 | EC 3.1.1.-   |
|                  |                                  | 5-pyridoxolactonase                                            | EC 3.1.1.-   |
|                  |                                  | acetylesterase                                                 | EC 3.1.1.6   |
|                  |                                  | arylesterase                                                   | EC 3.1.1.2   |
|                  |                                  | butyrolactone hydrolase                                        | EC 3.1.1.-   |
|                  |                                  | carboxylesterase                                               | EC 3.1.1.1   |

|             |                        |                                                        |                |
|-------------|------------------------|--------------------------------------------------------|----------------|
|             |                        | CHMOD hydrolase                                        | EC 3.1.1.-     |
|             |                        | cocaine esterase                                       | EC 3.1.1.84    |
|             |                        | diethylsuccinate esterase                              | EC 3.1.1.-     |
|             |                        | dihydrocoumarin hydrolase                              | EC 3.1.1.-     |
|             |                        | dimethyl isophthalate esterase                         | EC 3.1.1.-     |
|             |                        | ecgonine methyl esterase                               | EC 3.1.1.-     |
|             |                        | endosulfan lactone lactonase                           | EC 3.1.1.-     |
|             |                        | ethylsuccinate esterase                                | EC 3.1.1.-     |
|             |                        | isopropyl salicylate esterase                          | EC 3.1.1.-     |
|             |                        | malathion esterase                                     | EC 3.1.1.-     |
|             |                        | malathion monocarboxylate esterase                     | EC 3.1.1.-     |
|             |                        | monomethyl isophthalate esterase                       | EC 3.1.1.-     |
|             |                        | pyrethroid hydrolase                                   | EC 3.1.1.88    |
|             |                        | tropinesterase                                         | EC 3.1.1.10    |
| valsartan   | amide                  | 2-hydroxy-2',6'-diethyl-N-acetanilide hydrolase        | EC 3.3.2.-     |
|             | dealkylation           | alachlor hydrolase                                     | EC 3.3.2.-     |
|             |                        | caffeine demethylase                                   | EC 1.13.12.-   |
|             |                        | heteroxanthine demethylase                             | EC 1.14.13.128 |
|             |                        | hydroxymonomethylisoprotruron dimethylaminohydrogenase | EC 1.5.99.-    |
|             |                        | isoprotruron dimethylaminohydrogenase                  | EC 1.5.99.-    |
|             |                        | monodemethylisoprotruron dimethylaminohydrogenase      | EC 1.5.99.-    |
|             |                        | N-isopropylacetaniline monoxygenase                    | EC 1.14.-      |
|             |                        | paraxanthine demethylase                               | EC 1.13.12.-   |
|             |                        | theobromine demethylase                                | EC 1.13.12.-   |
| venlafaxine | amine                  | 4-methylaminobutanate oxidase                          | EC 1.5.3.19    |
|             | dealkylation and ether | caffeine demethylase                                   | EC 1.13.12.-   |
|             | dealkylation           | cyclohexylamine oxidase                                | EC 1.4.3.12    |
|             |                        | dimethylamine dehydrogenase                            | EC 1.5.8.1     |
|             |                        | heteroxanthine demethylase                             | EC 1.14.13.128 |
|             |                        | N-methylaurine dehydrogenase                           | EC 1.4.99.2    |
|             |                        | trimethylamine dehydrogenase                           | EC 1.5.8.2     |

<sup>a</sup>The experimentally observed biotransformation types and biotransformation products were previously reported by Helbling and colleagues (2). <sup>b</sup>The predicted bacterial enzymes and EC numbers for each observed biotransformation were obtained from the University of Minnesota Biocatalysis/Biodegradation Database (4). <sup>c</sup>Ammonia monoxygenase was excluded from the predicted bacterial enzymes for ethofumesate because we experimentally demonstrated that ammonia monoxygenase does not catalyze this biotransformation (2).



## REFERENCES

1. **Majewsky M, Gallé T, Yargeau V, Fischer K.** 2011. Active heterotrophic biomass and sludge retention time (SRT) as determining factors for biodegradation kinetics of pharmaceuticals in activated sludge. *Bioresour. Technol.* **102**:7415-7421.
2. **Helbling DE, Johnson DR, Honti M, Fenner K.** 2012. Micropollutant biotransformation kinetics associate with WWTP process performance parameters and microbial community characteristics. *Environ. Sci. Technol.* **46**:10579-10588.
3. **Zavaleta ES, Pasari JR, Hulvey KB, Timan GD.** 2010. Sustaining multiple ecosystem functions in grassland communities requires higher biodiversity. *Proc. Natl. Acad. Sci. U. S. A.* **107**:1443-1446.
4. **Ellis LB, Roe D, Wackett LB.** 2006. The University of Minnesota Biocatalysis/Biodegradation Database: the first decade. *Nucleic Acids Res.* **34**:D517-D521.
